# Supplementary material for: Light-induced spherical to dumbbell-like morphology transition of coumarin-functionalized latex nanoparticles by a [2π + 2π] cycloaddition reaction: a fast and facile strategy to anisotropic geometry
Source: Royal Society of Chemistry journal article supplement (doi:10.1039/d0py00078g), 2020-01-01
Supplement: d0py00078g1.pdf [file d0py00078g1.pdf]

## Supporting Information

### **Light-Induced Spherical to Dumbbell-Like Morphology Transition of Coumarin-Functionalized Latex Nanoparticles by $[2\pi+2\pi]$ Cycloaddition Reaction: Fast and Facile Strategy to Anisotropic Geometry**

**Amin Abdollahi,<sup>1</sup> Hossein Roghani-Mamaqani,<sup>1\*</sup> Ata Herizchi,<sup>2</sup> Hossein Alidaei-Sharif,<sup>1</sup>**

**Amirhossein Enayati,<sup>1</sup> Sanaz Sajedi-Amin<sup>3</sup>**

<sup>1</sup> Faculty of Polymer Engineering, Sahand University of Technology, P.O. Box: 51335-1996, Tabriz, Iran

<sup>2</sup> Faculty of Chemical Engineering, Sahand University of Technology, P.O. Box 51335-1996, Tabriz, Iran

<sup>3</sup> Department of Analytical Chemistry, Faculty of Chemistry, University of Tabriz, Tabriz, Iran

Email address: r.mamaghani@sut.ac.ir

## 1. Characterization of CUOH by $^1\text{H}$ NMR spectroscopy

Figure S1 shows  $^1\text{H}$  NMR spectrum of CUOH in  $\text{CDCl}_3$  recorded on a 400 MHz Bruker instrument.

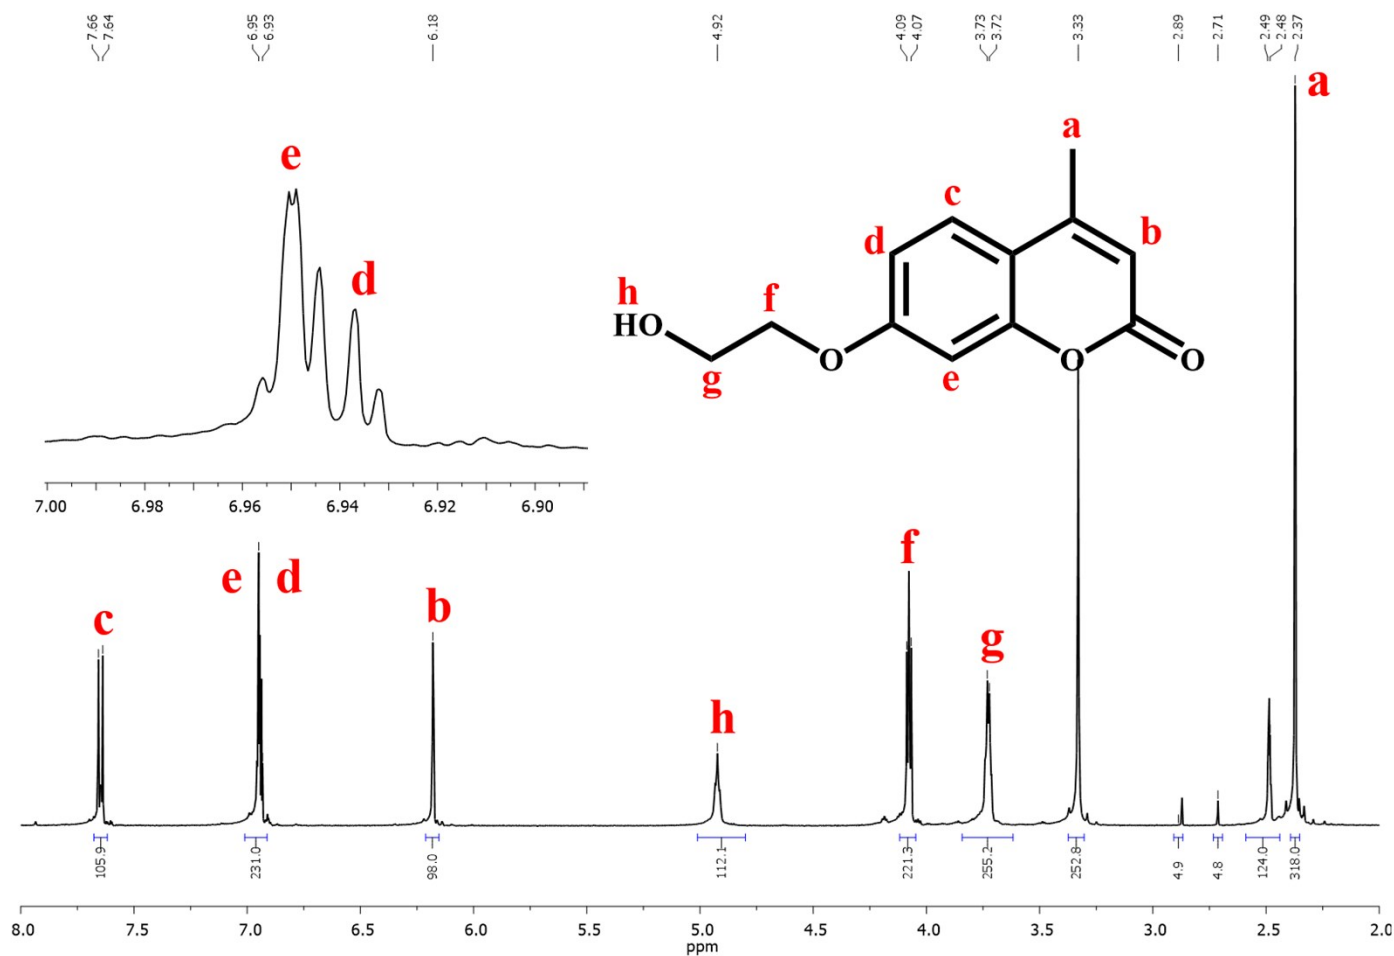

Figure S1-  $^1\text{H}$  NMR spectrum of CUOH

## 2. Characterization of CU<sub>2</sub>COOH by <sup>1</sup>H NMR spectroscopy

Figure S2 shows <sup>1</sup>H NMR spectrum of CU<sub>2</sub>COOH in CDCl<sub>3</sub> recorded on a 400 MHz Bruker instrument.

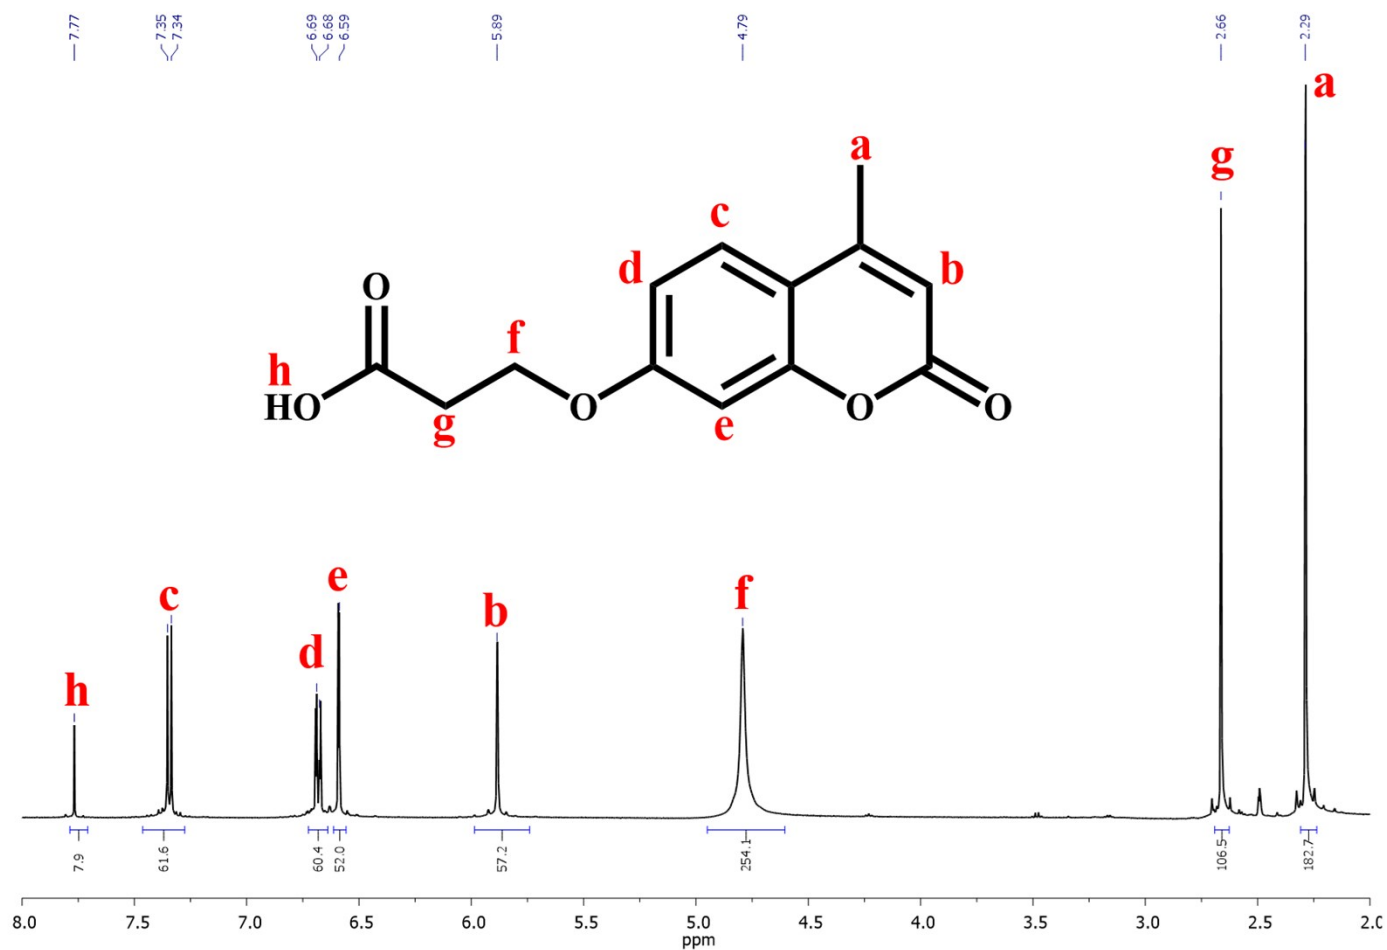

Figure S2- <sup>1</sup>H NMR spectrum of CU<sub>2</sub>COOH

### 3. Zeta potential measurement of the latex nanoparticles

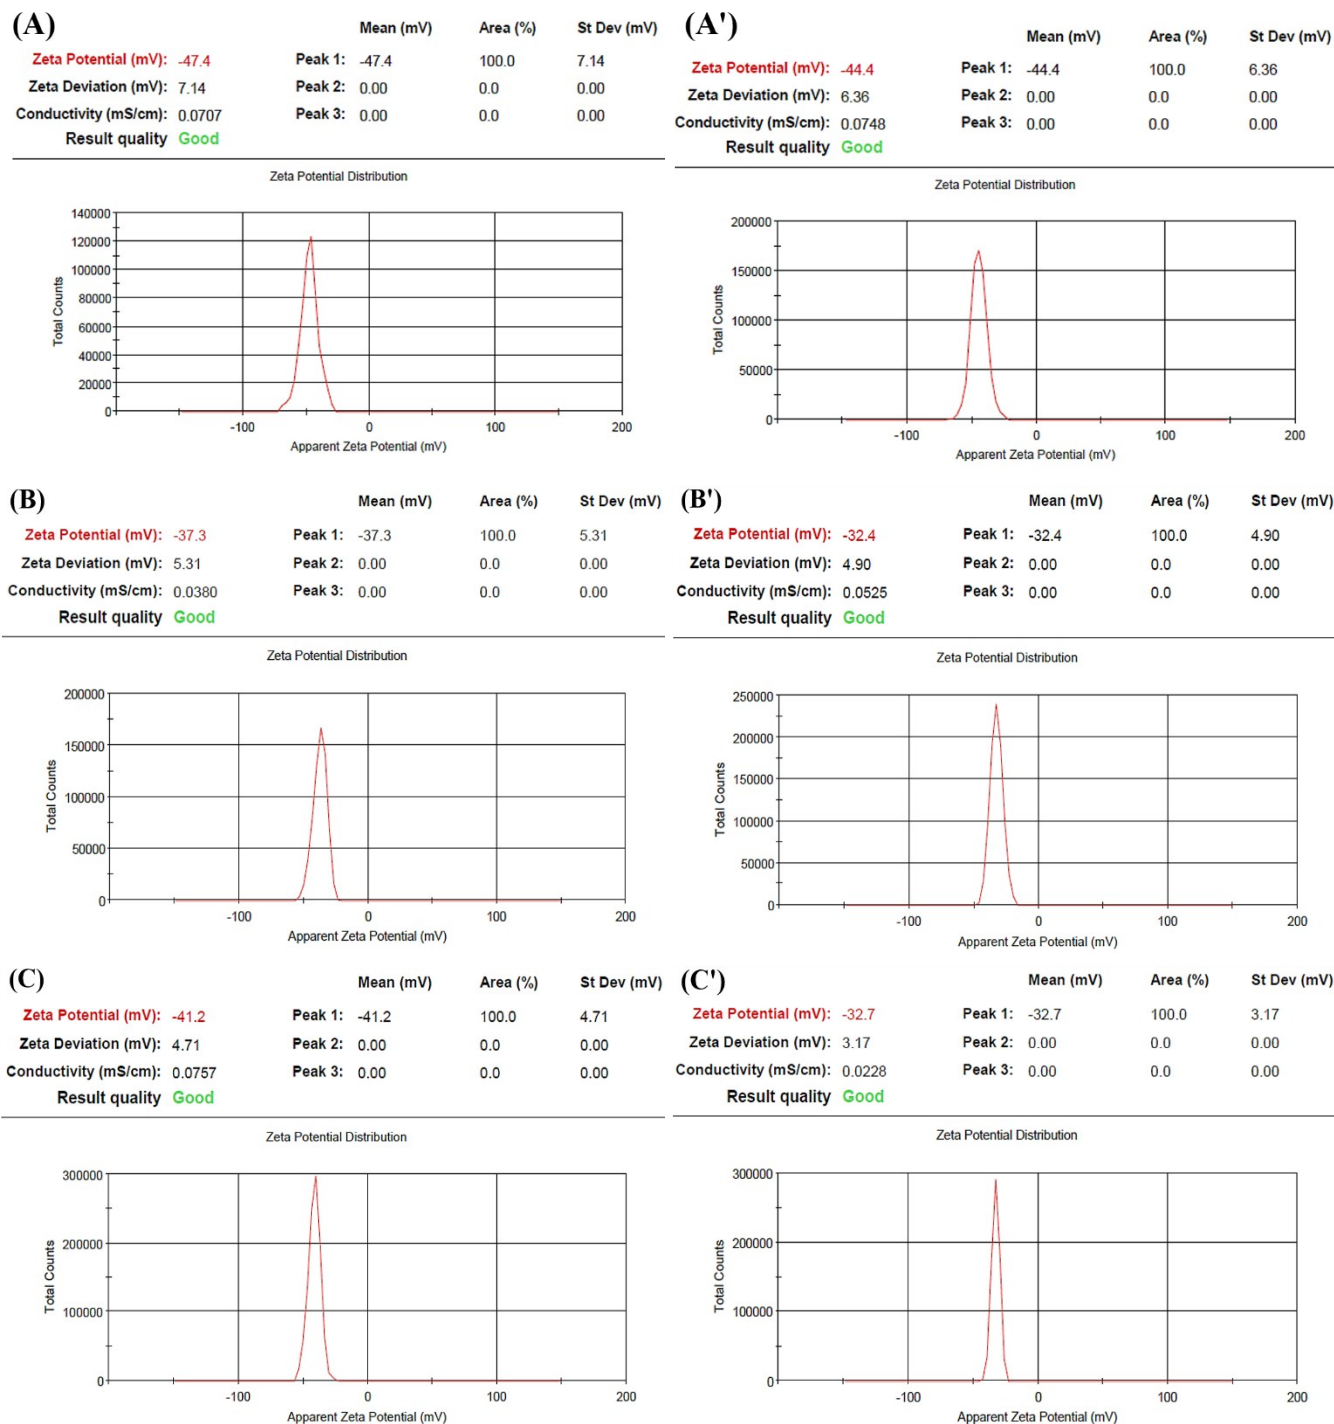

Figure S3- Zeta potential curves for the latex nanoparticles: (A) CLNPs-20, (A') CLNPs-20-CUOOH, (B) ELNPs-20, (B') ELNPs-20CUOH, (C) HLNPs-20, and (C') HLNPs-20-CUOOH

Figure S3 showed zeta potential curves for the functional latex nanoparticles (0.1 wt%) before and after modification with coumarin molecules.

#### 4. Solid content determination

Gravimetric method is a general procedure to determine the total non-volatile content of a liquid sample (ASTM 4426-92a). The total non-volatile solids of a liquid sample are determined by evaporation of the volatile component (s) and calculation of the weight percent of the solids based on the amount of remaining residue (using Equation 1).<sup>1-3</sup>

$$\text{Solid percent} = (\text{Weight residue (g)} \times 100) / (\text{Initial sample weight}) \quad (\text{Equation 1})$$

The polymerization conversion was also calculated by using a similar gravimetric method at the end of the polymerization reaction after addition of hydroquinone solution (1% (w/v)) as the inhibitor (using Equation 2).<sup>1-3</sup>

$$\text{Conversion (\%)} = (\text{Weight residue (g)} \times 100) / (\text{Initial sample weight (g)} \times \text{Solid percent}) \quad (\text{Equation 2})$$

#### 5. Reference

- 1 A. Abdollahi, A. Herizchi, H. Roghani-Mamaqani and H. Alidaei-Sharif, *Carbohydr. Polym.*, 2020, **230**, 115603.
- 2 A. Abdollahi, K. Sahandi-Zangabad and H. Roghani-Mamaqani, *Langmuir*, 2018, **34**, 13910–13923.
- 3 A. Abdollahi, K. Sahandi-Zangabad and H. Roghani-Mamaqani, *ACS Appl. Mater. Interfaces*, 2018, **10**, 39279–39292.
